# Supplementary material for: Conformational coupling between extracellular and transmembrane domains modulates holo-adhesion GPCR function
Source: PubMed Central journal article supplement — Nat Commun. 2024 Dec 4;15:10545. doi: 10.1038/s41467-024-54836-4 (PMC11615224; doi:10.1038/s41467-024-54836-4), 2024-12-04
Supplement: 41467_2024_54836_MOESM2_ESM.pdf [file 41467_2024_54836_MOESM2_ESM.pdf]

## Description of Additional Supplementary Files

### **File name: Supplementary Movie 1**

**Description: Cryo-EM density of ADGRL3/LK3 complex.** Video displaying cryo-EM density of the ADGRL3/LK3 complex (low-pass filtered to 6 Å), along with a 3.9 Å reconstruction of HormR/GAIN domains from local refinement. Densities are colored by appropriate domains: HormR – purple, GAIN – green, TA peptide – pink, 7TM – blue. sAB LK3 is colored yellow. Structures of HormR/GAIN/LK3 (this paper) and 7TM region (PDB: 8jmt) are fitted within their respective densities.

### **File name: Supplementary Movie 2**

**Description: 3D Variability Display of ADGRL3 HormR/GAIN/7TM.** Output of 20 frames from 3D Variability Analysis visualized as a movie using USCF Chimera, demonstrating the movement of HormR/GAIN domains relative to the 7TM/micelle.
