# Supplementary material for: Conformational coupling between extracellular and transmembrane domains modulates holo-adhesion GPCR function
Source: Springer Nature journal article supplement (doi:10.1038/s41467-024-54836-4), 2024-12-04
Supplement: MOESM7 [file 41467_2024_54836_MOESM7_ESM.xlsx]

## Sheet: Fig. 4e
	histogram data								peak fit
		Y795:R933 UAA		Y795:E1099 UAA		Y795:A871 UAA			Y795:R933 UAA
	FRET	mean	s.e.m.	mean	s.e.m.	mean	s.e.m.		peak1		s.e.
	-0.2	4.8128e-06	3.39125e-06	1.28882e-06	1.28882e-06	2.84754e-06	1.99785e-06		xc	0.31511	0.11956
	-0.19	0	0	0	0	0	0		FWHM	0.20016	0.06193
	-0.18	0	0	0	0	0	0		peak2
	-0.17	4.24088e-06	4.24088e-06	0	0	0	0		xc	0.41411	0.03578
	-0.16	0	0	0	0	0	0		FWHM	0.18442	0.06182
	-0.15	0	0	1.27914e-06	1.27914e-06	1.00612e-06	1.00612e-06		peak3
	-0.14	4.58218e-06	3.17724e-06	1.28882e-06	1.28882e-06	0	0		xc	0.54421	0.07867
	-0.13	3.00293e-06	2.00707e-06	0	0	0	0		FWHM	0.20016	0.0516
	-0.12	2.04806e-06	2.04806e-06	1.1352e-05	9.1983e-06	0	0
	-0.11	5.93733e-06	3.95672e-06	0	0	8.20769e-07	8.20769e-07		Y795:E1099 UAA
	-0.1	5.0998e-06	5.0998e-06	0	0	0	0		peak1		s.e.
	-0.09	1.26626e-05	4.62515e-06	5.3602e-06	5.3602e-06	0	0		xc	0.3445	0.11523
	-0.08	3.35732e-06	2.28874e-06	1.29417e-06	1.29417e-06	1.32531e-06	1.32531e-06		FWHM	0.21193	0.05973
	-0.07	1.34038e-05	5.55699e-06	2.89354e-06	1.84933e-06	6.0183e-06	6.0183e-06		peak2
	-0.06	2.32052e-05	6.37628e-06	1.17443e-05	7.57882e-06	3.85365e-06	2.57226e-06		xc	0.4444	0.02902
	-0.05	6.93674e-06	3.66688e-06	1.34156e-05	7.37779e-06	4.94105e-06	2.26743e-06		FWHM	0.19043	0.08003
	-0.04	4.70634e-05	2.13385e-05	2.93536e-05	1.40403e-05	4.88585e-06	3.27483e-06		peak3
	-0.03	1.36248e-05	5.73476e-06	2.53236e-05	1.29349e-05	5.85675e-06	2.07962e-06		xc	0.55444	0.1654
	-0.02	4.88461e-05	1.03709e-05	4.93757e-05	2.95031e-05	1.00612e-06	1.00612e-06		FWHM	0.21193	0.09203
	-0.01	6.69104e-05	1.46136e-05	8.05235e-05	4.09011e-05	5.28566e-06	2.61908e-06
	0	8.25027e-05	2.40492e-05	9.34097e-05	3.43854e-05	1.18072e-05	5.74418e-06		Y795:A871 UAA
	0.01	0.000113355	2.69062e-05	0.000171117	5.75941e-05	1.97064e-05	1.03597e-05		peak1		s.e.
	0.02	0.000162383	2.81323e-05	0.000112509	4.88905e-05	1.23955e-05	5.21029e-06		xc	0.4349	0.10692
	0.03	0.000198413	4.72915e-05	0.000162481	6.44957e-05	3.10112e-05	1.08388e-05		FWHM	0.20016	0.05866
	0.04	0.00022634	6.53818e-05	0.000289714	9.23208e-05	2.97463e-05	1.11787e-05		peak2
	0.05	0.000337719	7.56562e-05	0.000293303	9.7516e-05	2.53365e-05	9.36787e-06		xc	0.54614	0.02551
	0.06	0.000357279	6.72287e-05	0.000381814	0.000107379	5.0515e-05	2.20287e-05		FWHM	0.18551	0.07791
	0.07	0.000515672	0.000121252	0.000619055	0.00016409	6.71076e-05	1.81783e-05		peak3
	0.08	0.000615145	0.000136571	0.000638998	0.000178394	8.83414e-05	3.04816e-05		xc	0.65	0.07967
	0.09	0.000843512	0.000192233	0.000611303	0.000153092	0.000116422	3.50242e-05		FWHM	0.20016	0.04133
	0.1	0.00101	0.000160314	0.000986489	0.000207039	0.000114603	3.00183e-05
	0.11	0.00128	0.000223259	0.00108	0.00024971	0.000132923	3.89828e-05
	0.12	0.00175	0.000300152	0.00127	0.000260161	0.000179974	5.47676e-05
	0.13	0.00189	0.000324089	0.00164	0.000307945	0.000206359	6.12526e-05
	0.14	0.00234	0.000416269	0.00201	0.000413667	0.000259837	9.20236e-05
	0.15	0.00277	0.000437388	0.00217	0.00031084	0.000308805	8.16513e-05
	0.16	0.00357	0.000519907	0.00278	0.000432648	0.000337538	8.29992e-05
	0.17	0.00436	0.000616721	0.00345	0.000502779	0.000416277	0.000123765
	0.18	0.00489	0.000567788	0.00358	0.000476065	0.00054393	0.000141297
	0.19	0.00588	0.000767132	0.00452	0.000548778	0.00060915	0.000152451
	0.2	0.00688	0.000631608	0.0051	0.000589856	0.000684799	0.000159198
	0.21	0.00786	0.000765167	0.00594	0.000559629	0.000869328	0.000172116
	0.22	0.00943	0.00094923	0.0072	0.000573553	0.00102	0.000210521
	0.23	0.01062	0.00086991	0.00733	0.000573081	0.00116	0.000218701
	0.24	0.01214	0.000895763	0.00903	0.000573433	0.00153	0.000245992
	0.25	0.01334	0.000978927	0.01029	0.000540243	0.00165	0.000316429
	0.26	0.01492	0.00118	0.01175	0.000493108	0.00191	0.000259934
	0.27	0.01671	0.00119	0.01409	0.000698584	0.00216	0.00036617
	0.28	0.01914	0.00156	0.01542	0.000547686	0.0025	0.000368863
	0.29	0.02087	0.00134	0.01637	0.000306372	0.00295	0.000389885
	0.3	0.02279	0.00139	0.01866	0.000432752	0.00339	0.000479085
	0.31	0.02561	0.00171	0.02161	0.000689764	0.00406	0.000473248
	0.32	0.02741	0.00133	0.02129	0.000731252	0.00478	0.000550012
	0.33	0.029	0.00172	0.02516	0.00080225	0.00524	0.000598617
	0.34	0.03086	0.00183	0.02575	0.000818425	0.00632	0.000642529
	0.35	0.03298	0.00171	0.02737	0.00133	0.00698	0.00061354
	0.36	0.03214	0.00137	0.02903	0.00157	0.00802	0.000709368
	0.37	0.03353	0.0016	0.03138	0.00108	0.00857	0.000631532
	0.38	0.03504	0.00176	0.03199	0.00119	0.01024	0.00070439
	0.39	0.03549	0.00142	0.03312	0.00146	0.01172	0.000709471
	0.4	0.03514	0.00138	0.03341	0.00173	0.01295	0.000836036
	0.41	0.03521	0.00127	0.03447	0.0013	0.01404	0.000649976
	0.42	0.03508	0.00132	0.0345	0.00109	0.01624	0.000879761
	0.43	0.03317	0.00135	0.03427	0.00141	0.0177	0.000795712
	0.44	0.03292	0.00125	0.03395	0.000975877	0.01866	0.000727754
	0.45	0.03052	0.00105	0.03393	0.000915141	0.02101	0.000842977
	0.46	0.02945	0.00126	0.03268	0.000556671	0.02281	0.000837475
	0.47	0.02864	0.00137	0.03176	0.000559282	0.02411	0.000899599
	0.48	0.02648	0.00139	0.03044	0.00051845	0.02534	0.000825323
	0.49	0.02424	0.00132	0.02856	0.000637938	0.02717	0.000798498
	0.5	0.02243	0.00123	0.02698	0.000332175	0.02848	0.000853718
	0.51	0.02103	0.0011	0.02574	0.000508281	0.03004	0.000991072
	0.52	0.01888	0.00127	0.02395	0.000498938	0.0311	0.000845376
	0.53	0.01688	0.00124	0.02263	0.000589239	0.03142	0.000690245
	0.54	0.01578	0.0013	0.02075	0.000692377	0.03194	0.000809577
	0.55	0.01406	0.0012	0.01843	0.00053395	0.03347	0.000863251
	0.56	0.013	0.00114	0.01682	0.00039178	0.03337	0.000660071
	0.57	0.0112	0.00111	0.0155	0.000675472	0.03374	0.00060808
	0.58	0.01048	0.00119	0.01385	0.000614955	0.03351	0.000801222
	0.59	0.00902	0.00119	0.01192	0.000358692	0.0331	0.000751736
	0.6	0.0079	0.000965844	0.01035	0.000247987	0.03179	0.00072215
	0.61	0.00682	0.00084634	0.00949	0.000355937	0.03158	0.000903011
	0.62	0.00608	0.000865221	0.00833	0.000357318	0.03029	0.00107
	0.63	0.00552	0.000758769	0.00712	0.000311609	0.02955	0.00111
	0.64	0.00503	0.000757232	0.00665	0.00032634	0.02717	0.00125
	0.65	0.00458	0.000792844	0.00542	0.000287938	0.02562	0.00101
	0.66	0.0038	0.000678149	0.00514	0.000536745	0.02502	0.00127
	0.67	0.00362	0.000722673	0.00421	0.000264934	0.02261	0.00101
	0.68	0.00284	0.000547919	0.00361	0.000313916	0.02154	0.00113
	0.69	0.00266	0.000520296	0.0032	0.000312935	0.01902	0.0012
	0.7	0.00218	0.000461232	0.00266	0.000177968	0.01737	0.000955725
	0.71	0.00183	0.000352839	0.00225	0.000208868	0.01569	0.00108
	0.72	0.00166	0.000393783	0.00198	0.000227098	0.01398	0.000976717
	0.73	0.00149	0.000402979	0.00144	0.000165743	0.01219	0.000801682
	0.74	0.00124	0.000323246	0.00139	0.000175755	0.01052	0.000687472
	0.75	0.0011	0.000316887	0.00119	0.000189585	0.00902	0.00073097
	0.76	0.00115	0.000338414	0.000942335	0.000113221	0.00805	0.000706111
	0.77	0.000809113	0.000235759	0.000863661	0.000145255	0.00677	0.000582702
	0.78	0.000683579	0.000228512	0.000713291	0.000135262	0.00586	0.000506264
	0.79	0.000675411	0.000232344	0.000573568	9.76425e-05	0.00489	0.000564039
	0.8	0.000681195	0.000280228	0.000427023	7.89593e-05	0.00405	0.000429993
	0.81	0.000639911	0.000252293	0.000438524	0.000124949	0.00332	0.000434235
	0.82	0.00041006	0.000157797	0.000272333	5.49697e-05	0.00278	0.000361236
	0.83	0.000331333	0.000144497	0.000365982	0.0001224	0.00232	0.000300036
	0.84	0.000374593	0.000128024	0.000255625	4.90967e-05	0.00179	0.000279066
	0.85	0.000386204	0.00020461	0.000160335	4.23446e-05	0.00161	0.000243602
	0.86	0.00025792	0.000139369	0.00013457	2.64142e-05	0.00122	0.000216581
	0.87	0.000263328	0.000145641	0.000107803	2.46747e-05	0.001	0.000179625
	0.88	0.000195998	0.000119402	0.000190426	0.000103391	0.000704925	0.000132343
	0.89	0.000116619	6.33838e-05	7.91715e-05	2.39552e-05	0.000618192	0.000109722
	0.9	0.000156659	9.44479e-05	0.000143763	5.08247e-05	0.000555026	0.000111007
	0.91	0.000128668	7.92167e-05	3.94887e-05	1.16779e-05	0.000372401	8.22293e-05
	0.92	9.78172e-05	6.1496e-05	3.00045e-05	7.74083e-06	0.000339145	7.62271e-05
	0.93	7.75787e-05	4.26128e-05	5.02178e-05	2.30307e-05	0.000253168	6.6028e-05
	0.94	6.70377e-05	3.99746e-05	5.68021e-05	2.70742e-05	0.000219698	5.52537e-05
	0.95	5.40712e-05	2.48412e-05	1.52219e-05	8.41787e-06	0.000151219	4.42295e-05
	0.96	5.40988e-05	3.39827e-05	8.73831e-05	8.09207e-05	0.00011049	2.96282e-05
	0.97	5.27436e-05	3.28216e-05	3.79799e-05	1.9781e-05	8.71568e-05	2.78764e-05
	0.98	3.18802e-05	2.33413e-05	1.05194e-05	5.14766e-06	9.9322e-05	3.22132e-05
	0.99	2.50407e-05	1.4923e-05	3.21273e-05	2.5566e-05	6.36479e-05	2.05606e-05
	1	9.3743e-06	7.73015e-06	8.45759e-06	5.40579e-06	5.59393e-05	2.29123e-05
	1.01	1.35553e-05	8.09405e-06	8.45759e-06	5.40579e-06	4.6122e-05	1.52205e-05
	1.02	2.00146e-05	1.43928e-05	1.94268e-06	1.94268e-06	3.23982e-05	1.37078e-05
	1.03	0	0	1.96448e-06	1.96448e-06	3.14834e-05	1.02537e-05
	1.04	7.76458e-06	7.76458e-06	0	0	1.97335e-05	9.27302e-06
	1.05	0	0	0	0	1.03002e-05	4.8531e-06
	1.06	7.76458e-06	7.76458e-06	2.76855e-06	2.76855e-06	8.17628e-06	6.39964e-06
	1.07	5.56407e-06	3.97794e-06	0	0	1.22689e-05	4.9354e-06
	1.08	4.88938e-06	4.88938e-06	0	0	1.22058e-05	8.55891e-06
	1.09	0	0	0	0	2.29512e-06	1.55207e-06
	1.1	3.31972e-06	2.2131e-06	2.76855e-06	2.76855e-06	3.56195e-06	1.83688e-06
	1.11	0	0	0	0	1.04395e-05	4.20769e-06
	1.12	0	0	1.96448e-06	1.96448e-06	6.83025e-06	3.06737e-06
	1.13	0	0	0	0	2.41873e-06	2.41873e-06
	1.14	0	0	0	0	0	0
	1.15	0	0	0	0	0	0
	1.16	0	0	0	0	1.48245e-06	1.48245e-06
	1.17	0	0	0	0	0	0
	1.18	0	0	0	0	0	0
	1.19	0	0	0	0	1.27642e-06	1.27642e-06
	1.2	6.20633e-06	4.9021e-06	1.23798e-05	1.05571e-05	1.42749e-05	6.5775e-06

## Sheet: Fig. 5a
			Firefly (SRE dependent signaling)
	EV		19192	23093	22456
	ADGRL3	+ HBS	751095	488139	558730
		+ LK1	1489000	1225826	1232261
		+ LK3	538277	461006	520977
			Renilla (Tranfection control)
	EV		25736	39194	39434
	ADGRL3	+ HBS	54980	48661	54932
		+ LK1	50839	39220	33603
		+ LK3	57214	42773	45630
			Firefly/Renilla
	EV		0.745726	0.589197	0.569458
	ADGRL3	+ HBS	13.6612	10.0314	10.1713
		+ LK1	29.2885	31.2551	36.6712
		+ LK3	9.40813	10.778	11.4174
			Fold increase over EV
	EV		1.17475	0.928171	0.897075
	ADGRL3	+ HBS	21.5208	15.8026	16.023
		+ LK1	46.1387	49.2367	57.7686
		+ LK3	14.8208	16.9787	17.986

## Sheet: Fig. 5b
	histogram data				peak fit
		1 µM LK1			1 µM LK1
	FRET	mean	s.e.m.		peak1		s.e.
	-0.2	2.27203e-06	1.54968e-06		xc	0.43997	0.07998
	-0.19	0	0		FWHM	0.20016	0.04225
	-0.18	0	0		peak2
	-0.17	0	0		xc	0.55121	0.04308
	-0.16	0	0		FWHM	0.18775	0.13215
	-0.15	0	0		peak3
	-0.14	0	0		xc	0.65434	0.23426
	-0.13	0	0		FWHM	0.20016	0.11631
	-0.12	1.79089e-06	1.79089e-06
	-0.11	3.30774e-06	2.23062e-06
	-0.1	0	0
	-0.09	0	0
	-0.08	0	0
	-0.07	2.86861e-06	2.86861e-06
	-0.06	0	0
	-0.05	0	0
	-0.04	0	0
	-0.03	8.55804e-06	4.57175e-06
	-0.02	3.57938e-06	3.57938e-06
	-0.01	6.07096e-06	4.66615e-06
	0	1.88561e-05	6.08666e-06
	0.01	9.02556e-06	4.92515e-06
	0.02	3.06318e-05	1.64985e-05
	0.03	2.78855e-05	1.18735e-05
	0.04	3.02565e-05	1.36093e-05
	0.05	3.06693e-05	9.30025e-06
	0.06	6.01585e-05	1.62382e-05
	0.07	8.32964e-05	2.02798e-05
	0.08	0.000128831	2.87426e-05
	0.09	0.000109387	3.39859e-05
	0.1	0.000220879	5.65729e-05
	0.11	0.000149567	4.14245e-05
	0.12	0.000220746	5.40331e-05
	0.13	0.000340557	8.21554e-05
	0.14	0.000442275	8.3994e-05
	0.15	0.000529021	0.000114303
	0.16	0.000579178	0.000156587
	0.17	0.000667912	0.000176276
	0.18	0.000936535	0.000192483
	0.19	0.00102	0.000161142
	0.2	0.00123	0.000185869
	0.21	0.00133	0.000177673
	0.22	0.00159	0.00021667
	0.23	0.00191	0.00023824
	0.24	0.00231	0.000255417
	0.25	0.00262	0.000308875
	0.26	0.00325	0.000301477
	0.27	0.00361	0.000410928
	0.28	0.00431	0.000485023
	0.29	0.00511	0.000536509
	0.3	0.00614	0.000608266
	0.31	0.00685	0.000705409
	0.32	0.00785	0.000818606
	0.33	0.00909	0.00103
	0.34	0.01022	0.00102
	0.35	0.01169	0.00131
	0.36	0.01313	0.00121
	0.37	0.01459	0.00146
	0.38	0.0163	0.00139
	0.39	0.01816	0.00156
	0.4	0.02057	0.00157
	0.41	0.02204	0.00161
	0.42	0.02424	0.00161
	0.43	0.02531	0.00183
	0.44	0.02701	0.00139
	0.45	0.02842	0.00136
	0.46	0.02929	0.00106
	0.47	0.03099	0.0013
	0.48	0.03146	0.00112
	0.49	0.03136	0.00085714
	0.5	0.03244	0.000696236
	0.51	0.03237	0.000403712
	0.52	0.03276	0.000643831
	0.53	0.03252	0.000625821
	0.54	0.03232	0.000687673
	0.55	0.03166	0.000802797
	0.56	0.03133	0.00122
	0.57	0.0298	0.0012
	0.58	0.02859	0.00124
	0.59	0.02802	0.00152
	0.6	0.02577	0.0015
	0.61	0.02442	0.00166
	0.62	0.02291	0.00157
	0.63	0.02186	0.00172
	0.64	0.01998	0.00151
	0.65	0.01878	0.00157
	0.66	0.01696	0.00136
	0.67	0.01607	0.00137
	0.68	0.01409	0.00136
	0.69	0.01241	0.00135
	0.7	0.01132	0.00119
	0.71	0.00997	0.00107
	0.72	0.00878	0.000956427
	0.73	0.00751	0.00090536
	0.74	0.0066	0.000742486
	0.75	0.0057	0.00075536
	0.76	0.00466	0.000580589
	0.77	0.00398	0.000533034
	0.78	0.00357	0.000482489
	0.79	0.00287	0.000423792
	0.8	0.00264	0.000362743
	0.81	0.00178	0.000281382
	0.82	0.00149	0.000248785
	0.83	0.00124	0.000206335
	0.84	0.00106	0.000197537
	0.85	0.000831303	0.000155525
	0.86	0.000732516	0.000147267
	0.87	0.000574512	0.000114806
	0.88	0.000418248	0.000129712
	0.89	0.000318249	8.02871e-05
	0.9	0.000219465	4.86044e-05
	0.91	0.00015521	6.20027e-05
	0.92	0.000188126	6.97639e-05
	0.93	0.000117599	4.46652e-05
	0.94	8.99742e-05	3.39695e-05
	0.95	0.000121731	3.54444e-05
	0.96	5.64889e-05	2.33001e-05
	0.97	4.36999e-05	1.27865e-05
	0.98	6.02298e-05	2.3748e-05
	0.99	6.05099e-05	1.91133e-05
	1	2.75766e-05	7.80393e-06
	1.01	1.92553e-05	9.9026e-06
	1.02	1.42459e-05	7.51115e-06
	1.03	1.14126e-05	7.75467e-06
	1.04	3.79104e-06	3.79104e-06
	1.05	1.65872e-05	1.14275e-05
	1.06	1.81152e-06	1.81152e-06
	1.07	8.34999e-06	6.6079e-06
	1.08	8.09974e-06	2.97948e-06
	1.09	0	0
	1.1	5.85122e-06	4.212e-06
	1.11	0	0
	1.12	4.64296e-06	4.64296e-06
	1.13	0	0
	1.14	0	0
	1.15	0	0
	1.16	0	0
	1.17	0	0
	1.18	0	0
	1.19	0	0
	1.2	1.31006e-05	1.02057e-05

## Sheet: Fig. 5d
	histogram data				peak fit
		1 µM LK3			1 µM LK3
	FRET	mean	s.e.m.		peak1		s.e.
	-0.2	2.43358e-06	2.43358e-06		xc	0.43555	0.05195
	-0.19	0	0		FWHM	0.20016	0.035
	-0.18	0	0		peak2
	-0.17	0	0		xc	0.55289	0.01209
	-0.16	0	0		FWHM	0.17629	0.03728
	-0.15	0	0		peak3
	-0.14	0	0		xc	0.6697	0.03137
	-0.13	0	0		FWHM	0.20016	0.02105
	-0.12	7.62486e-07	7.62486e-07
	-0.11	1.68255e-06	1.12697e-06
	-0.1	0	0
	-0.09	0	0
	-0.08	0	0
	-0.07	1.50213e-06	1.50213e-06
	-0.06	6.44815e-06	3.40739e-06
	-0.05	5.22754e-06	4.31115e-06
	-0.04	0	0
	-0.03	5.2326e-06	4.31346e-06
	-0.02	4.72714e-06	2.87272e-06
	-0.01	1.14221e-05	6.69005e-06
	0	1.4524e-05	9.14876e-06
	0.01	1.75339e-05	7.06244e-06
	0.02	2.39539e-05	6.94844e-06
	0.03	3.39148e-05	1.10634e-05
	0.04	2.96563e-05	7.4804e-06
	0.05	2.79701e-05	1.41035e-05
	0.06	6.13255e-05	2.93002e-05
	0.07	7.0278e-05	2.75082e-05
	0.08	8.49392e-05	3.109e-05
	0.09	8.92851e-05	2.02847e-05
	0.1	0.000148134	4.21028e-05
	0.11	0.000151839	4.63377e-05
	0.12	0.000191214	5.50811e-05
	0.13	0.000242119	5.16507e-05
	0.14	0.000331423	7.62393e-05
	0.15	0.000355169	9.74354e-05
	0.16	0.0003904	9.8104e-05
	0.17	0.000435644	0.000102909
	0.18	0.000558395	0.000124535
	0.19	0.000720355	0.000141374
	0.2	0.000803365	0.000154741
	0.21	0.000895455	0.000191849
	0.22	0.00113	0.000217974
	0.23	0.0013	0.000240395
	0.24	0.00145	0.000261141
	0.25	0.00173	0.000316611
	0.26	0.00212	0.000407771
	0.27	0.0025	0.000405011
	0.28	0.0028	0.000459592
	0.29	0.00325	0.000458835
	0.3	0.00356	0.000448912
	0.31	0.00438	0.000605932
	0.32	0.00497	0.000576005
	0.33	0.00533	0.00060456
	0.34	0.00622	0.000715915
	0.35	0.00705	0.000579481
	0.36	0.00793	0.000754546
	0.37	0.00875	0.000705928
	0.38	0.00981	0.000714626
	0.39	0.01107	0.000662714
	0.4	0.01203	0.000645931
	0.41	0.01352	0.000570243
	0.42	0.0152	0.000537133
	0.43	0.01601	0.000579649
	0.44	0.01743	0.000546013
	0.45	0.01886	0.000661324
	0.46	0.02036	0.000504109
	0.47	0.0217	0.00051571
	0.48	0.02338	0.00040139
	0.49	0.02443	0.000575278
	0.5	0.02549	0.000592753
	0.51	0.02686	0.000693245
	0.52	0.02773	0.000519268
	0.53	0.02938	0.000665877
	0.54	0.02919	0.000448368
	0.55	0.03083	0.000582208
	0.56	0.03049	0.00075407
	0.57	0.03096	0.00067121
	0.58	0.03097	0.00057465
	0.59	0.03113	0.000851125
	0.6	0.03039	0.00085865
	0.61	0.02945	0.000647342
	0.62	0.0294	0.00103
	0.63	0.02836	0.000939288
	0.64	0.02781	0.000865274
	0.65	0.02698	0.000904077
	0.66	0.02475	0.000766645
	0.67	0.02415	0.00103
	0.68	0.02267	0.000904035
	0.69	0.02141	0.000929794
	0.7	0.01953	0.000962005
	0.71	0.01811	0.000883924
	0.72	0.01649	0.000802057
	0.73	0.01518	0.000676623
	0.74	0.01363	0.000804243
	0.75	0.01212	0.000620311
	0.76	0.01061	0.000516971
	0.77	0.00954	0.000548489
	0.78	0.00832	0.000499701
	0.79	0.00703	0.000391743
	0.8	0.00619	0.000316446
	0.81	0.00528	0.000321923
	0.82	0.00453	0.000314202
	0.83	0.00386	0.000343863
	0.84	0.00314	0.000312025
	0.85	0.00245	0.00021898
	0.86	0.00216	0.000220882
	0.87	0.00172	0.000205054
	0.88	0.00148	0.00017831
	0.89	0.00112	0.000166212
	0.9	0.000929355	0.000132214
	0.91	0.000743633	0.00011515
	0.92	0.000708474	0.000110131
	0.93	0.000460639	9.05346e-05
	0.94	0.000366825	6.79307e-05
	0.95	0.000321686	6.33368e-05
	0.96	0.000271599	5.27682e-05
	0.97	0.000215964	4.94334e-05
	0.98	0.000183066	4.93355e-05
	0.99	0.000119688	2.64827e-05
	1	0.000157079	3.94127e-05
	1.01	0.000104683	2.75269e-05
	1.02	8.48623e-05	2.92412e-05
	1.03	7.09279e-05	2.00332e-05
	1.04	5.28435e-05	1.35591e-05
	1.05	4.49349e-05	1.26708e-05
	1.06	3.62159e-05	1.19126e-05
	1.07	4.61914e-05	3.29933e-05
	1.08	2.35223e-05	8.62391e-06
	1.09	2.29291e-05	6.3195e-06
	1.1	1.70888e-05	6.43738e-06
	1.11	1.10927e-05	4.29125e-06
	1.12	1.32783e-05	7.10995e-06
	1.13	2.53185e-06	1.32259e-06
	1.14	9.51983e-06	3.79947e-06
	1.15	3.83968e-06	2.26704e-06
	1.16	3.36514e-06	1.81207e-06
	1.17	3.85959e-06	2.4621e-06
	1.18	2.14824e-06	2.14824e-06
	1.19	4.37139e-06	2.43466e-06
	1.2	5.05854e-05	1.611e-05

## Sheet: Fig. 5g
		Control		1 µM LK1		1 µM LK3
	FRET	mean	s.e.m.	mean	s.e.m.	mean	s.e.m.
	-0.2	2.84754e-06	1.99785e-06	2.27203e-06	1.54968e-06	2.43358e-06	2.43358e-06
	-0.19	0	0	0	0	0	0
	-0.18	0	0	0	0	0	0
	-0.17	0	0	0	0	0	0
	-0.16	0	0	0	0	0	0
	-0.15	1.00612e-06	1.00612e-06	0	0	0	0
	-0.14	0	0	0	0	0	0
	-0.13	0	0	0	0	0	0
	-0.12	0	0	1.79089e-06	1.79089e-06	7.62486e-07	7.62486e-07
	-0.11	8.20769e-07	8.20769e-07	3.30774e-06	2.23062e-06	1.68255e-06	1.12697e-06
	-0.1	0	0	0	0	0	0
	-0.09	0	0	0	0	0	0
	-0.08	1.32531e-06	1.32531e-06	0	0	0	0
	-0.07	6.0183e-06	6.0183e-06	2.86861e-06	2.86861e-06	1.50213e-06	1.50213e-06
	-0.06	3.85365e-06	2.57226e-06	0	0	6.44815e-06	3.40739e-06
	-0.05	4.94105e-06	2.26743e-06	0	0	5.22754e-06	4.31115e-06
	-0.04	4.88585e-06	3.27483e-06	0	0	0	0
	-0.03	5.85675e-06	2.07962e-06	8.55804e-06	4.57175e-06	5.2326e-06	4.31346e-06
	-0.02	1.00612e-06	1.00612e-06	3.57938e-06	3.57938e-06	4.72714e-06	2.87272e-06
	-0.01	5.28566e-06	2.61908e-06	6.07096e-06	4.66615e-06	1.14221e-05	6.69005e-06
	0	1.18072e-05	5.74418e-06	1.88561e-05	6.08666e-06	1.4524e-05	9.14876e-06
	0.01	1.97064e-05	1.03597e-05	9.02556e-06	4.92515e-06	1.75339e-05	7.06244e-06
	0.02	1.23955e-05	5.21029e-06	3.06318e-05	1.64985e-05	2.39539e-05	6.94844e-06
	0.03	3.10112e-05	1.08388e-05	2.78855e-05	1.18735e-05	3.39148e-05	1.10634e-05
	0.04	2.97463e-05	1.11787e-05	3.02565e-05	1.36093e-05	2.96563e-05	7.4804e-06
	0.05	2.53365e-05	9.36787e-06	3.06693e-05	9.30025e-06	2.79701e-05	1.41035e-05
	0.06	5.0515e-05	2.20287e-05	6.01585e-05	1.62382e-05	6.13255e-05	2.93002e-05
	0.07	6.71076e-05	1.81783e-05	8.32964e-05	2.02798e-05	7.0278e-05	2.75082e-05
	0.08	8.83414e-05	3.04816e-05	0.000128831	2.87426e-05	8.49392e-05	3.109e-05
	0.09	0.000116422	3.50242e-05	0.000109387	3.39859e-05	8.92851e-05	2.02847e-05
	0.1	0.000114603	3.00183e-05	0.000220879	5.65729e-05	0.000148134	4.21028e-05
	0.11	0.000132923	3.89828e-05	0.000149567	4.14245e-05	0.000151839	4.63377e-05
	0.12	0.000179974	5.47676e-05	0.000220746	5.40331e-05	0.000191214	5.50811e-05
	0.13	0.000206359	6.12526e-05	0.000340557	8.21554e-05	0.000242119	5.16507e-05
	0.14	0.000259837	9.20236e-05	0.000442275	8.3994e-05	0.000331423	7.62393e-05
	0.15	0.000308805	8.16513e-05	0.000529021	0.000114303	0.000355169	9.74354e-05
	0.16	0.000337538	8.29992e-05	0.000579178	0.000156587	0.0003904	9.8104e-05
	0.17	0.000416277	0.000123765	0.000667912	0.000176276	0.000435644	0.000102909
	0.18	0.00054393	0.000141297	0.000936535	0.000192483	0.000558395	0.000124535
	0.19	0.00060915	0.000152451	0.00102	0.000161142	0.000720355	0.000141374
	0.2	0.000684799	0.000159198	0.00123	0.000185869	0.000803365	0.000154741
	0.21	0.000869328	0.000172116	0.00133	0.000177673	0.000895455	0.000191849
	0.22	0.00102	0.000210521	0.00159	0.00021667	0.00113	0.000217974
	0.23	0.00116	0.000218701	0.00191	0.00023824	0.0013	0.000240395
	0.24	0.00153	0.000245992	0.00231	0.000255417	0.00145	0.000261141
	0.25	0.00165	0.000316429	0.00262	0.000308875	0.00173	0.000316611
	0.26	0.00191	0.000259934	0.00325	0.000301477	0.00212	0.000407771
	0.27	0.00216	0.00036617	0.00361	0.000410928	0.0025	0.000405011
	0.28	0.0025	0.000368863	0.00431	0.000485023	0.0028	0.000459592
	0.29	0.00295	0.000389885	0.00511	0.000536509	0.00325	0.000458835
	0.3	0.00339	0.000479085	0.00614	0.000608266	0.00356	0.000448912
	0.31	0.00406	0.000473248	0.00685	0.000705409	0.00438	0.000605932
	0.32	0.00478	0.000550012	0.00785	0.000818606	0.00497	0.000576005
	0.33	0.00524	0.000598617	0.00909	0.00103	0.00533	0.00060456
	0.34	0.00632	0.000642529	0.01022	0.00102	0.00622	0.000715915
	0.35	0.00698	0.00061354	0.01169	0.00131	0.00705	0.000579481
	0.36	0.00802	0.000709368	0.01313	0.00121	0.00793	0.000754546
	0.37	0.00857	0.000631532	0.01459	0.00146	0.00875	0.000705928
	0.38	0.01024	0.00070439	0.0163	0.00139	0.00981	0.000714626
	0.39	0.01172	0.000709471	0.01816	0.00156	0.01107	0.000662714
	0.4	0.01295	0.000836036	0.02057	0.00157	0.01203	0.000645931
	0.41	0.01404	0.000649976	0.02204	0.00161	0.01352	0.000570243
	0.42	0.01624	0.000879761	0.02424	0.00161	0.0152	0.000537133
	0.43	0.0177	0.000795712	0.02531	0.00183	0.01601	0.000579649
	0.44	0.01866	0.000727754	0.02701	0.00139	0.01743	0.000546013
	0.45	0.02101	0.000842977	0.02842	0.00136	0.01886	0.000661324
	0.46	0.02281	0.000837475	0.02929	0.00106	0.02036	0.000504109
	0.47	0.02411	0.000899599	0.03099	0.0013	0.0217	0.00051571
	0.48	0.02534	0.000825323	0.03146	0.00112	0.02338	0.00040139
	0.49	0.02717	0.000798498	0.03136	0.00085714	0.02443	0.000575278
	0.5	0.02848	0.000853718	0.03244	0.000696236	0.02549	0.000592753
	0.51	0.03004	0.000991072	0.03237	0.000403712	0.02686	0.000693245
	0.52	0.0311	0.000845376	0.03276	0.000643831	0.02773	0.000519268
	0.53	0.03142	0.000690245	0.03252	0.000625821	0.02938	0.000665877
	0.54	0.03194	0.000809577	0.03232	0.000687673	0.02919	0.000448368
	0.55	0.03347	0.000863251	0.03166	0.000802797	0.03083	0.000582208
	0.56	0.03337	0.000660071	0.03133	0.00122	0.03049	0.00075407
	0.57	0.03374	0.00060808	0.0298	0.0012	0.03096	0.00067121
	0.58	0.03351	0.000801222	0.02859	0.00124	0.03097	0.00057465
	0.59	0.0331	0.000751736	0.02802	0.00152	0.03113	0.000851125
	0.6	0.03179	0.00072215	0.02577	0.0015	0.03039	0.00085865
	0.61	0.03158	0.000903011	0.02442	0.00166	0.02945	0.000647342
	0.62	0.03029	0.00107	0.02291	0.00157	0.0294	0.00103
	0.63	0.02955	0.00111	0.02186	0.00172	0.02836	0.000939288
	0.64	0.02717	0.00125	0.01998	0.00151	0.02781	0.000865274
	0.65	0.02562	0.00101	0.01878	0.00157	0.02698	0.000904077
	0.66	0.02502	0.00127	0.01696	0.00136	0.02475	0.000766645
	0.67	0.02261	0.00101	0.01607	0.00137	0.02415	0.00103
	0.68	0.02154	0.00113	0.01409	0.00136	0.02267	0.000904035
	0.69	0.01902	0.0012	0.01241	0.00135	0.02141	0.000929794
	0.7	0.01737	0.000955725	0.01132	0.00119	0.01953	0.000962005
	0.71	0.01569	0.00108	0.00997	0.00107	0.01811	0.000883924
	0.72	0.01398	0.000976717	0.00878	0.000956427	0.01649	0.000802057
	0.73	0.01219	0.000801682	0.00751	0.00090536	0.01518	0.000676623
	0.74	0.01052	0.000687472	0.0066	0.000742486	0.01363	0.000804243
	0.75	0.00902	0.00073097	0.0057	0.00075536	0.01212	0.000620311
	0.76	0.00805	0.000706111	0.00466	0.000580589	0.01061	0.000516971
	0.77	0.00677	0.000582702	0.00398	0.000533034	0.00954	0.000548489
	0.78	0.00586	0.000506264	0.00357	0.000482489	0.00832	0.000499701
	0.79	0.00489	0.000564039	0.00287	0.000423792	0.00703	0.000391743
	0.8	0.00405	0.000429993	0.00264	0.000362743	0.00619	0.000316446
	0.81	0.00332	0.000434235	0.00178	0.000281382	0.00528	0.000321923
	0.82	0.00278	0.000361236	0.00149	0.000248785	0.00453	0.000314202
	0.83	0.00232	0.000300036	0.00124	0.000206335	0.00386	0.000343863
	0.84	0.00179	0.000279066	0.00106	0.000197537	0.00314	0.000312025
	0.85	0.00161	0.000243602	0.000831303	0.000155525	0.00245	0.00021898
	0.86	0.00122	0.000216581	0.000732516	0.000147267	0.00216	0.000220882
	0.87	0.001	0.000179625	0.000574512	0.000114806	0.00172	0.000205054
	0.88	0.000704925	0.000132343	0.000418248	0.000129712	0.00148	0.00017831
	0.89	0.000618192	0.000109722	0.000318249	8.02871e-05	0.00112	0.000166212
	0.9	0.000555026	0.000111007	0.000219465	4.86044e-05	0.000929355	0.000132214
	0.91	0.000372401	8.22293e-05	0.00015521	6.20027e-05	0.000743633	0.00011515
	0.92	0.000339145	7.62271e-05	0.000188126	6.97639e-05	0.000708474	0.000110131
	0.93	0.000253168	6.6028e-05	0.000117599	4.46652e-05	0.000460639	9.05346e-05
	0.94	0.000219698	5.52537e-05	8.99742e-05	3.39695e-05	0.000366825	6.79307e-05
	0.95	0.000151219	4.42295e-05	0.000121731	3.54444e-05	0.000321686	6.33368e-05
	0.96	0.00011049	2.96282e-05	5.64889e-05	2.33001e-05	0.000271599	5.27682e-05
	0.97	8.71568e-05	2.78764e-05	4.36999e-05	1.27865e-05	0.000215964	4.94334e-05
	0.98	9.9322e-05	3.22132e-05	6.02298e-05	2.3748e-05	0.000183066	4.93355e-05
	0.99	6.36479e-05	2.05606e-05	6.05099e-05	1.91133e-05	0.000119688	2.64827e-05
	1	5.59393e-05	2.29123e-05	2.75766e-05	7.80393e-06	0.000157079	3.94127e-05
	1.01	4.6122e-05	1.52205e-05	1.92553e-05	9.9026e-06	0.000104683	2.75269e-05
	1.02	3.23982e-05	1.37078e-05	1.42459e-05	7.51115e-06	8.48623e-05	2.92412e-05
	1.03	3.14834e-05	1.02537e-05	1.14126e-05	7.75467e-06	7.09279e-05	2.00332e-05
	1.04	1.97335e-05	9.27302e-06	3.79104e-06	3.79104e-06	5.28435e-05	1.35591e-05
	1.05	1.03002e-05	4.8531e-06	1.65872e-05	1.14275e-05	4.49349e-05	1.26708e-05
	1.06	8.17628e-06	6.39964e-06	1.81152e-06	1.81152e-06	3.62159e-05	1.19126e-05
	1.07	1.22689e-05	4.9354e-06	8.34999e-06	6.6079e-06	4.61914e-05	3.29933e-05
	1.08	1.22058e-05	8.55891e-06	8.09974e-06	2.97948e-06	2.35223e-05	8.62391e-06
	1.09	2.29512e-06	1.55207e-06	0	0	2.29291e-05	6.3195e-06
	1.1	3.56195e-06	1.83688e-06	5.85122e-06	4.212e-06	1.70888e-05	6.43738e-06
	1.11	1.04395e-05	4.20769e-06	0	0	1.10927e-05	4.29125e-06
	1.12	6.83025e-06	3.06737e-06	4.64296e-06	4.64296e-06	1.32783e-05	7.10995e-06
	1.13	2.41873e-06	2.41873e-06	0	0	2.53185e-06	1.32259e-06
	1.14	0	0	0	0	9.51983e-06	3.79947e-06
	1.15	0	0	0	0	3.83968e-06	2.26704e-06
	1.16	1.48245e-06	1.48245e-06	0	0	3.36514e-06	1.81207e-06
	1.17	0	0	0	0	3.85959e-06	2.4621e-06
	1.18	0	0	0	0	2.14824e-06	2.14824e-06
	1.19	1.27642e-06	1.27642e-06	0	0	4.37139e-06	2.43466e-06
	1.2	1.42749e-05	6.5775e-06	1.31006e-05	1.02057e-05	5.05854e-05	1.611e-05

## Sheet: Fig. 5f
		1 µM LK1 Δ count (%)			1 µM LK3 Δ count (%)
	no. of states in a single trace	replicate1	replicate2	replicate3	replicate1	replicate2	replicate3
	1	2.874	5.43932	5.47748	-13.8553	6.36156	-2.82018
	2	-1.85573	-5.23949	-0.04258	10.5633	-4.78414	2.92822
	3	-1.01827	-0.19982	-6.425	2.90435	-1.1208	0.38948

## Sheet: Fig. 5h
		1 µM LK1 Δ occupancy (%)			1 µM LK3 Δ occupancy (%)
	FRET state	replicate1	replicate2	replicate3	replicate1	replicate2	replicate3
	0.44	16.9572	11.3169	27.746	-2.46154	4.20513	7.58974
	0.55	-13.539	1.23457	-16.4502	-3.28205	-9.4359	-9.53846
	0.65	-3.41819	-12.5514	-11.2957	7.28205	0.10256	1.02564

## Sheet: Fig. 5i
		1 µM LK1 Δ single-state traces (%)			1 µM LK3 Δ single-state traces (%)
	FRET state	replicate1	replicate2	replicate3	replicate1	replicate2	replicate3
	0.44	7.77778	20.0461	40.8432	7.63293	-3.54411	-7.88501
	0.55	11.5385	-9.72862	-21.3768	-7.41852	-11.7032	4.71192
	0.65	-19.3162	-10.3175	-19.4664	-0.21441	15.2473	3.17309

## Sheet: Fig. 6b
	histogram data
		ADGRL3 WT		ADGRL3 S810L/E811Q		ADGRL3 S810L/E811Q +1 µM LK1
	FRET	mean	s.e.m.	mean	s.e.m.	mean	s.e.m.
	-0.2	0	0	0	0	1.75183e-05	8.9342e-06
	-0.19	0	0	0	0	0	0
	-0.18	0	0	0	0	0	0
	-0.17	0	0	0	0	0	0
	-0.16	0	0	0	0	0	0
	-0.15	0	0	0	0	3.51729e-06	3.51729e-06
	-0.14	0	0	0	0	0	0
	-0.13	0	0	0	0	0	0
	-0.12	0	0	0	0	1.08201e-05	7.01176e-06
	-0.11	9.11965e-07	9.11965e-07	0	0	0	0
	-0.1	0	0	1.16389e-06	1.16389e-06	7.38378e-06	7.38378e-06
	-0.09	0	0	0	0	1.02093e-05	1.02093e-05
	-0.08	1.47257e-06	1.47257e-06	0	0	1.00576e-05	6.42968e-06
	-0.07	6.687e-06	6.687e-06	0	0	0	0
	-0.06	0	0	0	0	1.02093e-05	1.02093e-05
	-0.05	1.40606e-06	1.40606e-06	1.16389e-06	1.16389e-06	1.62241e-05	1.34448e-05
	-0.04	4.4751e-06	3.1558e-06	1.0947e-06	1.0947e-06	7.69087e-06	4.89171e-06
	-0.03	4.61829e-06	2.32999e-06	0	0	1.70352e-05	1.10882e-05
	-0.02	0	0	0	0	1.41912e-05	7.38663e-06
	-0.01	3.74512e-06	2.8545e-06	2.43658e-06	1.61182e-06	1.76764e-05	1.43379e-05
	0	1.24547e-05	6.41348e-06	2.39126e-06	1.58239e-06	2.87742e-05	1.87748e-05
	0.01	2.05478e-05	9.83667e-06	5.09543e-06	3.95824e-06	3.86536e-05	1.66847e-05
	0.02	7.98319e-06	3.39315e-06	1.40409e-05	8.07554e-06	1.28454e-05	9.63397e-06
	0.03	2.33742e-05	1.28327e-05	2.48643e-05	9.66972e-06	1.29905e-05	4.38495e-06
	0.04	2.86288e-05	1.205e-05	2.67823e-05	1.32877e-05	6.79638e-05	2.51929e-05
	0.05	2.2991e-05	9.25717e-06	3.15648e-05	1.37975e-05	7.18659e-05	3.74764e-05
	0.06	5.34406e-05	2.45216e-05	4.82927e-05	1.71421e-05	8.5962e-05	2.88532e-05
	0.07	6.19157e-05	2.15918e-05	5.64041e-05	2.3527e-05	9.93485e-05	3.77286e-05
	0.08	0.000100462	3.43369e-05	5.28766e-05	1.83577e-05	0.000100191	4.1522e-05
	0.09	0.000115697	3.87111e-05	9.14447e-05	4.54541e-05	0.000135031	4.25789e-05
	0.1	0.000119464	3.63343e-05	8.81719e-05	4.13874e-05	0.000173854	2.97551e-05
	0.11	0.000178399	5.0539e-05	0.000118117	5.45231e-05	0.000316508	7.25109e-05
	0.12	0.000242626	6.30773e-05	0.00016883	6.03732e-05	0.000340352	7.86464e-05
	0.13	0.000244744	6.76499e-05	0.000190137	5.89292e-05	0.000334515	5.22158e-05
	0.14	0.000350117	9.9136e-05	0.000279512	9.63561e-05	0.000469563	9.80191e-05
	0.15	0.000384345	0.00011198	0.000258606	9.24736e-05	0.000479788	9.11593e-05
	0.16	0.000453696	0.000106825	0.000357709	0.000124122	0.000483438	9.99597e-05
	0.17	0.000578137	0.000142306	0.000408623	0.000121262	0.000743226	0.000175612
	0.18	0.000688002	0.000148605	0.000434324	0.000157158	0.000806196	0.000168595
	0.19	0.000741887	0.00017656	0.000516104	0.000163898	0.00101	0.000175097
	0.2	0.000848618	0.000172375	0.000600272	0.000160293	0.00111	0.000183286
	0.21	0.0011	0.000208692	0.000751717	0.000203459	0.00145	0.000218142
	0.22	0.00126	0.000224752	0.000895257	0.000215223	0.00136	0.000210825
	0.23	0.00135	0.000226072	0.000978208	0.000216403	0.00184	0.000315823
	0.24	0.00182	0.000234861	0.00121	0.000262665	0.00206	0.000375163
	0.25	0.00199	0.000292055	0.00129	0.000259346	0.00252	0.000362033
	0.26	0.00222	0.000242935	0.0015	0.00030352	0.00255	0.000302081
	0.27	0.00263	0.000291253	0.00186	0.00029632	0.00296	0.000489506
	0.28	0.00299	0.000348642	0.00215	0.000402006	0.00343	0.000533945
	0.29	0.00362	0.000273012	0.00226	0.000429544	0.00454	0.000703967
	0.3	0.00403	0.000371791	0.00292	0.000442211	0.00488	0.000807059
	0.31	0.00468	0.000368543	0.00313	0.000472695	0.00552	0.000809186
	0.32	0.00543	0.000443588	0.00369	0.000588011	0.00579	0.000891875
	0.33	0.00636	0.000413339	0.00405	0.000531356	0.00681	0.00106
	0.34	0.00726	0.000622689	0.00455	0.000626467	0.00749	0.00106
	0.35	0.00813	0.000612787	0.00504	0.000606298	0.00794	0.000961486
	0.36	0.00953	0.000653815	0.00571	0.000689005	0.00969	0.00141
	0.37	0.01028	0.000457876	0.00668	0.000839853	0.01048	0.00131
	0.38	0.01171	0.000712958	0.00727	0.000732578	0.01119	0.00153
	0.39	0.01313	0.000636237	0.00826	0.000800419	0.01229	0.0017
	0.4	0.01437	0.000598228	0.00918	0.000799577	0.01364	0.00176
	0.41	0.01575	0.000576407	0.01011	0.000741793	0.01473	0.00168
	0.42	0.018	0.000697041	0.0111	0.00085885	0.01617	0.00181
	0.43	0.01911	0.000735211	0.01235	0.000777722	0.01797	0.0019
	0.44	0.02094	0.00039815	0.01359	0.00087074	0.01896	0.00157
	0.45	0.02287	0.000616154	0.01479	0.000886008	0.02032	0.0019
	0.46	0.02451	0.000539569	0.01595	0.000954827	0.02167	0.00126
	0.47	0.026	0.000533611	0.01731	0.000880697	0.02238	0.00188
	0.48	0.02709	0.000639201	0.01888	0.000827803	0.02469	0.00175
	0.49	0.02832	0.000561634	0.02014	0.000825381	0.02596	0.00112
	0.5	0.02994	0.000672709	0.0214	0.000991873	0.02648	0.0015
	0.51	0.03161	0.0006701	0.02298	0.000852014	0.02725	0.00107
	0.52	0.03188	0.000808724	0.02452	0.000650469	0.02815	0.0012
	0.53	0.03204	0.000654149	0.02564	0.000496026	0.02939	0.00147
	0.54	0.03293	0.000708178	0.02717	0.000863004	0.03047	0.00104
	0.55	0.03334	0.000708174	0.02789	0.000729148	0.03038	0.000800592
	0.56	0.03371	0.000839506	0.02911	0.000986086	0.03196	0.000930034
	0.57	0.03277	0.000701315	0.02992	0.000977107	0.03171	0.0014
	0.58	0.03251	0.000881597	0.03073	0.00070311	0.02947	0.00153
	0.59	0.03229	0.000694902	0.03127	0.00075904	0.03034	0.00161
	0.6	0.03069	0.000477709	0.03201	0.000985401	0.02993	0.0023
	0.61	0.02954	0.000420986	0.03166	0.000974292	0.02964	0.00243
	0.62	0.0285	0.000772597	0.03149	0.00121	0.02828	0.00214
	0.63	0.02745	0.00069001	0.03168	0.00127	0.02772	0.00245
	0.64	0.02459	0.000742483	0.03168	0.00129	0.02692	0.00252
	0.65	0.02393	0.00088511	0.03046	0.00106	0.02589	0.00232
	0.66	0.02196	0.000957323	0.02995	0.00133	0.02446	0.00232
	0.67	0.02101	0.00075772	0.02823	0.00126	0.02263	0.00214
	0.68	0.01853	0.000871948	0.02669	0.00123	0.02118	0.00198
	0.69	0.01686	0.000962905	0.02576	0.00122	0.01972	0.00212
	0.7	0.01535	0.000960289	0.02437	0.00148	0.01757	0.00175
	0.71	0.0138	0.000697928	0.02268	0.00144	0.01609	0.00134
	0.72	0.01187	0.00070191	0.02062	0.00111	0.01424	0.00141
	0.73	0.01099	0.000776154	0.01887	0.000979436	0.01257	0.00106
	0.74	0.00941	0.000630578	0.01724	0.000962284	0.01117	0.00102
	0.75	0.00797	0.000695708	0.01564	0.000903709	0.01029	0.00093635
	0.76	0.00711	0.000499288	0.01383	0.000783975	0.00873	0.000657532
	0.77	0.00617	0.000625399	0.01241	0.000849978	0.00758	0.000634178
	0.78	0.00517	0.000499228	0.01085	0.000672824	0.00641	0.000554368
	0.79	0.00436	0.000449752	0.00964	0.000664273	0.00537	0.000578136
	0.8	0.00373	0.000342335	0.00805	0.000588859	0.00486	0.000447972
	0.81	0.00321	0.000347126	0.0069	0.000553856	0.00426	0.000398165
	0.82	0.00259	0.00031904	0.00586	0.000514247	0.00338	0.000471434
	0.83	0.00202	0.000276589	0.00513	0.000476942	0.00284	0.000430617
	0.84	0.00167	0.000255042	0.0044	0.00054183	0.00254	0.00038793
	0.85	0.0014	0.000249706	0.00371	0.000475306	0.00206	0.000416317
	0.86	0.0011	0.000196391	0.00304	0.000372966	0.00181	0.000456715
	0.87	0.000836156	0.000174245	0.00253	0.000386123	0.00148	0.000259567
	0.88	0.000672427	0.000133097	0.00217	0.000338069	0.00105	0.000169006
	0.89	0.000597831	0.000165631	0.00172	0.000299512	0.000891225	0.000240257
	0.9	0.000489629	0.000113419	0.00143	0.000246784	0.000659115	0.0001819
	0.91	0.000332444	0.000130097	0.00127	0.000238638	0.000657142	0.000153574
	0.92	0.00029935	9.63119e-05	0.000993464	0.000214985	0.000518991	0.000154639
	0.93	0.000300349	9.60147e-05	0.000843923	0.000161138	0.000457125	0.000175462
	0.94	0.000194482	0.00010335	0.000694692	0.000162967	0.000407945	0.000114923
	0.95	0.000119252	4.14184e-05	0.000565869	0.000138261	0.000323281	0.000114722
	0.96	7.881e-05	3.82146e-05	0.000550972	0.000139409	0.000291705	0.00011909
	0.97	7.4288e-05	2.44282e-05	0.000410382	0.000101561	0.000121718	7.82399e-05
	0.98	5.8008e-05	2.4878e-05	0.000345898	8.8231e-05	0.000157799	8.05683e-05
	0.99	2.82459e-05	1.13294e-05	0.000321782	0.000100113	0.000147165	6.40635e-05
	1	4.21746e-05	1.71118e-05	0.000236757	8.70784e-05	7.98282e-05	4.14144e-05
	1.01	1.72498e-05	9.04749e-06	0.000170046	5.00331e-05	0.000118929	7.52787e-05
	1.02	1.92218e-05	8.93543e-06	0.000130638	3.43931e-05	8.88794e-05	5.35833e-05
	1.03	1.09016e-05	7.29826e-06	0.000130538	5.52224e-05	7.04837e-05	3.69135e-05
	1.04	9.73391e-06	6.15877e-06	8.82976e-05	3.03149e-05	5.57244e-05	3.23152e-05
	1.05	2.93824e-06	2.93824e-06	6.68415e-05	2.14113e-05	1.81312e-05	9.99594e-06
	1.06	2.146e-06	2.146e-06	7.80548e-05	2.99616e-05	1.8559e-05	9.0618e-06
	1.07	7.53759e-06	4.50221e-06	4.07321e-05	1.2179e-05	6.02888e-05	2.81917e-05
	1.08	1.46912e-06	1.46912e-06	4.1434e-05	1.05413e-05	1.99545e-05	1.1048e-05
	1.09	1.46912e-06	1.46912e-06	2.77279e-05	1.27345e-05	1.04548e-05	1.04548e-05
	1.1	3.31605e-06	2.21159e-06	3.10964e-05	1.67633e-05	1.66583e-05	7.51487e-06
	1.11	6.8119e-06	4.74944e-06	3.96108e-05	1.54759e-05	6.27746e-06	6.27746e-06
	1.12	1.46912e-06	1.46912e-06	1.87503e-05	1.06087e-05	8.71369e-06	8.71369e-06
	1.13	0	0	1.26096e-05	4.0951e-06	2.76467e-05	1.43736e-05
	1.14	0	0	2.97039e-05	1.79728e-05	7.33988e-06	7.33988e-06
	1.15	0	0	1.42992e-05	5.34957e-06	1.11721e-05	7.77961e-06
	1.16	0	0	1.65466e-05	4.86198e-06	5.22876e-06	5.22876e-06
	1.17	0	0	2.78537e-05	1.48714e-05	5.27593e-06	5.27593e-06
	1.18	0	0	4.51968e-06	3.46183e-06	1.86212e-05	1.33166e-05
	1.19	0	0	0	0	9.64785e-06	9.64785e-06
	1.2	4.40736e-06	4.40736e-06	7.89667e-05	2.46048e-05	9.22969e-05	4.99639e-05

## Sheet: Fig. 6c
	histogram data				peak fit
		ADGRL3 S810L/E811Q			ADGRL3 S810L/E811Q
	FRET	mean	s.e.m.		peak1		s.e.
	-0.2	0	0		xc	0.43359	0.06721
	-0.19	0	0		FWHM	0.20016	0.05095
	-0.18	0	0		peak2
	-0.17	0	0		xc	0.54807	0.0131
	-0.16	0	0		FWHM	0.16526	0.03824
	-0.15	0	0		peak3
	-0.14	0	0		xc	0.66439	0.01974
	-0.13	0	0		FWHM	0.20016	0.01517
	-0.12	0	0
	-0.11	0	0
	-0.1	1.16389e-06	1.16389e-06
	-0.09	0	0
	-0.08	0	0
	-0.07	0	0
	-0.06	0	0
	-0.05	1.16389e-06	1.16389e-06
	-0.04	1.0947e-06	1.0947e-06
	-0.03	0	0
	-0.02	0	0
	-0.01	2.43658e-06	1.61182e-06
	0	2.39126e-06	1.58239e-06
	0.01	5.09543e-06	3.95824e-06
	0.02	1.40409e-05	8.07554e-06
	0.03	2.48643e-05	9.66972e-06
	0.04	2.67823e-05	1.32877e-05
	0.05	3.15648e-05	1.37975e-05
	0.06	4.82927e-05	1.71421e-05
	0.07	5.64041e-05	2.3527e-05
	0.08	5.28766e-05	1.83577e-05
	0.09	9.14447e-05	4.54541e-05
	0.1	8.81719e-05	4.13874e-05
	0.11	0.000118117	5.45231e-05
	0.12	0.00016883	6.03732e-05
	0.13	0.000190137	5.89292e-05
	0.14	0.000279512	9.63561e-05
	0.15	0.000258606	9.24736e-05
	0.16	0.000357709	0.000124122
	0.17	0.000408623	0.000121262
	0.18	0.000434324	0.000157158
	0.19	0.000516104	0.000163898
	0.2	0.000600272	0.000160293
	0.21	0.000751717	0.000203459
	0.22	0.000895257	0.000215223
	0.23	0.000978208	0.000216403
	0.24	0.00121	0.000262665
	0.25	0.00129	0.000259346
	0.26	0.0015	0.00030352
	0.27	0.00186	0.00029632
	0.28	0.00215	0.000402006
	0.29	0.00226	0.000429544
	0.3	0.00292	0.000442211
	0.31	0.00313	0.000472695
	0.32	0.00369	0.000588011
	0.33	0.00405	0.000531356
	0.34	0.00455	0.000626467
	0.35	0.00504	0.000606298
	0.36	0.00571	0.000689005
	0.37	0.00668	0.000839853
	0.38	0.00727	0.000732578
	0.39	0.00826	0.000800419
	0.4	0.00918	0.000799577
	0.41	0.01011	0.000741793
	0.42	0.0111	0.00085885
	0.43	0.01235	0.000777722
	0.44	0.01359	0.00087074
	0.45	0.01479	0.000886008
	0.46	0.01595	0.000954827
	0.47	0.01731	0.000880697
	0.48	0.01888	0.000827803
	0.49	0.02014	0.000825381
	0.5	0.0214	0.000991873
	0.51	0.02298	0.000852014
	0.52	0.02452	0.000650469
	0.53	0.02564	0.000496026
	0.54	0.02717	0.000863004
	0.55	0.02789	0.000729148
	0.56	0.02911	0.000986086
	0.57	0.02992	0.000977107
	0.58	0.03073	0.00070311
	0.59	0.03127	0.00075904
	0.6	0.03201	0.000985401
	0.61	0.03166	0.000974292
	0.62	0.03149	0.00121
	0.63	0.03168	0.00127
	0.64	0.03168	0.00129
	0.65	0.03046	0.00106
	0.66	0.02995	0.00133
	0.67	0.02823	0.00126
	0.68	0.02669	0.00123
	0.69	0.02576	0.00122
	0.7	0.02437	0.00148
	0.71	0.02268	0.00144
	0.72	0.02062	0.00111
	0.73	0.01887	0.000979436
	0.74	0.01724	0.000962284
	0.75	0.01564	0.000903709
	0.76	0.01383	0.000783975
	0.77	0.01241	0.000849978
	0.78	0.01085	0.000672824
	0.79	0.00964	0.000664273
	0.8	0.00805	0.000588859
	0.81	0.0069	0.000553856
	0.82	0.00586	0.000514247
	0.83	0.00513	0.000476942
	0.84	0.0044	0.00054183
	0.85	0.00371	0.000475306
	0.86	0.00304	0.000372966
	0.87	0.00253	0.000386123
	0.88	0.00217	0.000338069
	0.89	0.00172	0.000299512
	0.9	0.00143	0.000246784
	0.91	0.00127	0.000238638
	0.92	0.000993464	0.000214985
	0.93	0.000843923	0.000161138
	0.94	0.000694692	0.000162967
	0.95	0.000565869	0.000138261
	0.96	0.000550972	0.000139409
	0.97	0.000410382	0.000101561
	0.98	0.000345898	8.8231e-05
	0.99	0.000321782	0.000100113
	1	0.000236757	8.70784e-05
	1.01	0.000170046	5.00331e-05
	1.02	0.000130638	3.43931e-05
	1.03	0.000130538	5.52224e-05
	1.04	8.82976e-05	3.03149e-05
	1.05	6.68415e-05	2.14113e-05
	1.06	7.80548e-05	2.99616e-05
	1.07	4.07321e-05	1.2179e-05
	1.08	4.1434e-05	1.05413e-05
	1.09	2.77279e-05	1.27345e-05
	1.1	3.10964e-05	1.67633e-05
	1.11	3.96108e-05	1.54759e-05
	1.12	1.87503e-05	1.06087e-05
	1.13	1.26096e-05	4.0951e-06
	1.14	2.97039e-05	1.79728e-05
	1.15	1.42992e-05	5.34957e-06
	1.16	1.65466e-05	4.86198e-06
	1.17	2.78537e-05	1.48714e-05
	1.18	4.51968e-06	3.46183e-06
	1.19	0	0
	1.2	7.89667e-05	2.46048e-05

[truncated: 22 more sheets: Fig. 6d, Fig. 6e, Fig. 6f, Fig. 6g, Fig. 6h, Fig. 6i, Supp. Fig. 1a, Supp. Fig. 1e, Supp. Fig. 1f, Supp. Fig. 2c, Supp. Fig. 2d, Supp. Fig. 2e, Supp. Fig. 2f, Supp. Fig. 9a, Supp. Fig. 9b, Supp. Fig. 10, Supp. Fig. 13a, Supp. Fig. 13b, Supp. Fig. 15a, Supp. Fig. 15b …]
